# Supplementary material
Source: publisher figshare collection journal article supplement (https://aacr.figshare.com/articles/dataset/_/22474475)
Supplement: Supplementary file 1 [file 39925970]

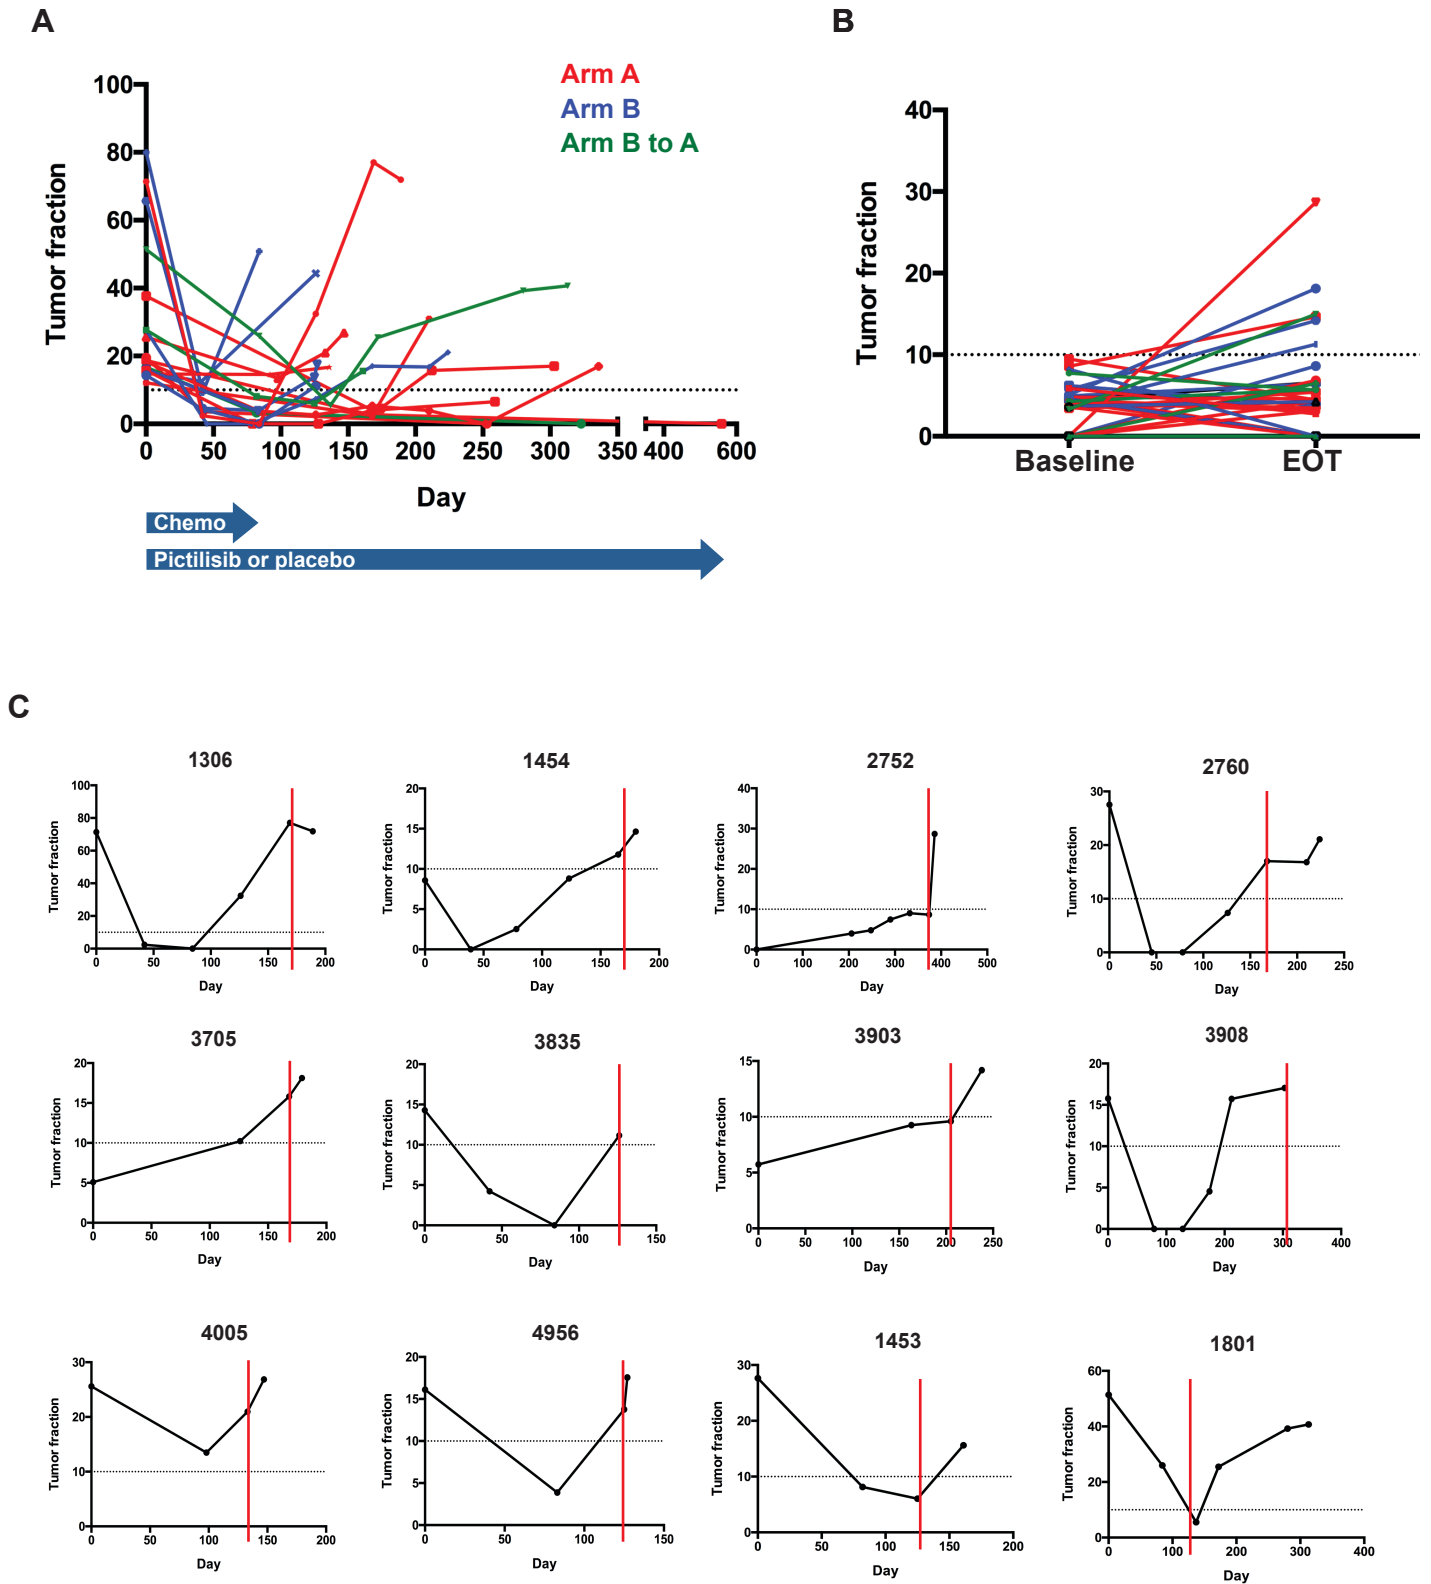

**Figure S7.**

cfDNA tumor fraction dynamics. **(A-B)**, Tumor fraction over time in patients with baseline tumor fraction  $\geq 10\%$  **(A)** and  $< 10\%$  **(B)**. Arm A, chemotherapy plus pictilisib; Arm B, chemotherapy plus placebo. Some patients crossed over from Arm B to A at disease progression. **C**, Tumor fraction dynamics in 12 patients where elevated tumor fraction in cfDNA was observed before or at clinical progression (1306 - 4956) and after progression (1453, 1801). 1453 and 1801 crossed over to the pictilisib arm at disease progression. Red line indicates the number of days to progression.
